# Supplementary material for: Effect of Severe External Airborne Agents’ Exposure on Dementia
Source: J Clin Med. 2020 Dec 17;9(12):4069. doi: 10.3390/jcm9124069 (PMC7766205; doi:10.3390/jcm9124069)
Supplement: Supplementary file 1 [file jcm-09-04069-s001.pdf]

**Table S1.** Age-standardized incidence ratio and 95% confidence intervals of dementia according to type of severe external airborne dust exposure.

|                                                                                                    | Dementia     |           | SIR (95% CI)     |
|----------------------------------------------------------------------------------------------------|--------------|-----------|------------------|
|                                                                                                    | No           | Yes       |                  |
| Severe external airborne dust exposure (J60-70, except J69)*                                       | 1,229 (91.7) | 111 (8.3) | 1.04 (0.85–1.24) |
| J60 Coalworker pneumoconiosis                                                                      | 369 (90.9)   | 37 (9.1)  | 0.93 (0.63–1.24) |
| J61 Pneumoconiosis due to asbestos and other mineral fibbers                                       | 107 (89.2)   | 13 (10.8) | 1.18 (0.54–1.82) |
| J62 Pneumoconiosis due to dust containing silica                                                   | 49 (100.0)   | 0 (0.0)   | -                |
| J63 Pneumoconiosis due to other inorganic dusts                                                    | 11 (84.6)    | 2 (15.4)  | 1.86 (0.01–4.44) |
| J64 Unspecified pneumoconiosis                                                                     | 300 (91.7)   | 27 (8.3)  | 0.91 (0.57–1.25) |
| J65 Pneumoconiosis associated with tuberculosis                                                    | 22 (84.6)    | 4 (15.4)  | 1.26 (0.03–2.50) |
| J66 Airway disease due to specific organic dust                                                    | 10 (90.9)    | 1 (9.1)   | 1.16 (0.01–3.42) |
| J67 Hypersensitivity pneumonitis due to organic dust                                               | 127 (92.0)   | 11 (8.0)  | 1.52 (0.62–2.42) |
| J68 Respiratory conditions due to inhalation of chemicals, gases, fumes and vapors                 | 126 (91.3)   | 12 (8.7)  | 1.87 (0.81–2.94) |
| J70 Respiratory conditions due to other external agents                                            | 108 (96.4)   | 4 (3.6)   | 0.53 (0.02–1.05) |
| SIR: Age-standardized incidence ratio; CI: Confidence interval; *These codes are the ICD-10 codes. |              |           |                  |

**Table S2:** Logistic regression results of positive dementia screening test according to type of severe external airborne dust exposure.

|                                                                                    | Dementia screening test |           | OR (95% CI)      |
|------------------------------------------------------------------------------------|-------------------------|-----------|------------------|
|                                                                                    | Negative                | Positive  |                  |
| Severe external airborne dust exposure (J60-70, except J69)*                       | 167 (74.9)              | 56 (25.1) | 1.42 (1.02–1.98) |
| J60 Coalworker pneumoconiosis                                                      | 55 (67.1)               | 27 (32.9) | 1.97 (1.19–3.26) |
| J61 Pneumoconiosis due to asbestos and other mineral fibbers                       | 13 (76.5)               | 4 (23.5)  | 1.21 (0.33–4.41) |
| J62 Pneumoconiosis due to dust containing silica                                   | 8 (100.0)               | 0 (0.0)   | -                |
| J63 Pneumoconiosis due to other inorganic dusts                                    | 2 (100.0)               | 0 (0.0)   | -                |
| J64 Unspecified pneumoconiosis                                                     | 37 (80.4)               | 9 (19.6)  | 1.03 (0.48–2.25) |
| J65 Pneumoconiosis associated with tuberculosis                                    | 3 (100.0)               | 0 (0.0)   | -                |
| J66 Airway disease due to specific organic dust                                    | 2 (100.0)               | 0 (0.0)   | -                |
| J67 Hypersensitivity pneumonitis due to organic dust                               | 17 (81.0)               | 4 (19.0)  | 0.66 (0.15–2.90) |
| J68 Respiratory conditions due to inhalation of chemicals, gases, fumes and vapors | 10 (58.8)               | 7 (41.2)  | 2.56 (0.87–7.55) |
| J70 Respiratory conditions due to other external agents                            | 20 (80.0)               | 5 (20.0)  | 0.89 (0.31–2.64) |

Results were after adjusting of age, sex, household income level, cerebral vascular disease, cardiovascular disease, body mass index, smoking, and drinking status; OR: Odds Ratio, CI: Confidence interval, \*These codes are the ICD-10 codes.
